# Supplementary material
Source: PubMed Central journal article supplement (PMC9879756)
Supplement: glac135_suppl_supplementary_material.pdf [file glac135_suppl_supplementary_material.pdf]

**Supplemental Table S1: Clinical laboratory tests.** Data are summarized by means with standard deviations. P-values compare means estimated by the general linear mixed regression model. YAG-0w, YAG-2w = YA before and after receiving 2w of GlyNAC supplementation. OAG-0w, OAG-2w, OAG-16w, and OAP-0w, OAP-2w, OAP-16w = OA before and after 2w and 16w of GlyNAC, or placebo supplementation.

| Parameters                               | YAG-0w<br>(N=11) | YAG-2w<br>(N=11) | OAG-0w<br><i>YA-0w v</i><br><i>OAG-0w</i><br>(N=12) | OAG-2w<br>(N=12)              | OAG-16w<br><i>OAG-0w v</i><br><i>OAG-16w;</i><br><i>OAG-16w v</i><br><i>YA-0w</i><br>(N=11) | OAP-0w<br><i>YA-0w v</i><br><i>OAP-0w;</i><br><i>OAP-0w v</i><br><i>OAG-0w</i><br>(N=12) | OAP-2w<br>(N=12)                | OAP-16w<br><i>OAP-0w v</i><br><i>OAP-16w</i><br>(N=12) |
|------------------------------------------|------------------|------------------|-----------------------------------------------------|-------------------------------|---------------------------------------------------------------------------------------------|------------------------------------------------------------------------------------------|---------------------------------|--------------------------------------------------------|
| Hemoglobin<br>(g/L)                      | 13.7 ± 1.5       | 13.4 ± 1.5       | 14.7 ± 1.2<br><i>P=0.47</i>                         | 13.9 ± 0.8<br><i>P=0.017</i>  | 14.0 ± 0.8<br><i>P=0.17</i><br><i>P&gt;0.99</i>                                             | 14.0 ± 1.3<br><i>P&gt;0.99</i><br><i>P=0.82</i>                                          | 13.5 ± 1.2<br><i>P=0.23</i>     | 13.7 ± 1.2<br><i>P&gt;0.99</i>                         |
| Total protein<br>(g/dl)                  | 7.3 ± 0.3        | 7.1 ± 0.3        | 7.0 ± 0.4<br><i>P=0.18</i>                          | 6.9 ± 0.3<br><i>P&gt;0.99</i> | 6.8 ± 0.4<br><i>P&gt;0.99</i><br><i>P=0.052</i>                                             | 6.9 ± 0.2<br><i>P=0.032</i><br><i>P&gt;0.99</i>                                          | 6.8 ± 0.4<br><i>P&gt;0.99</i>   | 6.8 ± 0.4<br><i>P&gt;0.99</i>                          |
| Albumin<br>(mg/dl)                       | 4.7 ± 0.2        | 4.7 ± 0.3        | 4.3 ± 0.3<br><i>P=0.001</i>                         | 4.3 ± 0.4<br><i>P&gt;0.99</i> | 4.3 ± 0.3<br><i>P&gt;0.99</i><br><i>P=0.003</i>                                             | 4.4 ± 0.2<br><i>P=0.002</i><br><i>P&gt;0.99</i>                                          | 4.4 ± 0.2<br><i>P&gt;0.99</i>   | 4.3 ± 0.2<br><i>P&gt;0.99</i>                          |
| Total bilirubin<br>(mg/dl)               | 0.7 ± 0.4        | 0.6 ± 0.3        | 0.5 ± 0.1<br><i>P=0.29</i>                          | 0.5 ± 0.1<br><i>P&gt;0.99</i> | 0.4 ± 0.1<br><i>P&gt;0.99</i><br><i>P=0.11</i>                                              | 0.6 ± 0.3<br><i>P&gt;0.99</i><br><i>P&gt;0.99</i>                                        | 0.5 ± 0.3<br><i>P&gt;0.99</i>   | 0.4 ± 0.3<br><i>P=0.11</i>                             |
| Direct bilirubin<br>(mg/dl)              | 0.2 ± 0.1        | 0.1 ± 0.1        | 0.1 ± 0.0<br><i>P=0.38</i>                          | 0.1 ± 0.0<br><i>P&gt;0.99</i> | 0.1 ± 0.0<br><i>P&gt;0.99</i><br><i>P=0.36</i>                                              | 0.1 ± 0.1<br><i>P&gt;0.99</i><br><i>P&gt;0.99</i>                                        | 0.1 ± 0.1<br><i>P&gt;0.99</i>   | 0.1 ± 0.1<br><i>P&gt;0.99</i>                          |
| Alkaline<br>phosphatase<br>(U/L)         | 51.4 ±<br>17.3   | 54.0 ± 15.5      | 67.3 ± 17.7<br><i>P=0.17</i>                        | 71.0 ± 16.0<br><i>P=0.65</i>  | 72.2 ± 21.6<br><i>P=0.14</i><br><i>P=0.039</i>                                              | 72.4 ± 17.0<br><i>P=0.045</i><br><i>P&gt;0.99</i>                                        | 70.1 ± 16.9<br><i>P&gt;0.99</i> | 75.0 ± 17.2<br><i>P&gt;0.99</i>                        |
| Blood urea<br>nitrogen (BUN)<br>(mmol/L) | 13.9 ± 4.1       | 14.1 ± 3.6       | 14.9 ± 4.1<br><i>P&gt;0.99</i>                      | 17.8 ± 5.0<br><i>P=0.013</i>  | 14.7 ± 4.8<br><i>P&gt;0.99</i><br><i>P&gt;0.99</i>                                          | 15.1 ± 3.6<br><i>P&gt;0.99</i><br><i>P&gt;0.99</i>                                       | 17.2 ± 3.7<br><i>P=0.13</i>     | 16.6 ± 2.5<br><i>P = 0.45</i>                          |

| <b>Outcome measure</b>                          | <b>YAG-0w</b><br>(N=11) | <b>YAG-2w</b><br>(N=11) | <b>OAG-0w</b><br><i>YA-0w v</i><br><i>OAG-0w</i><br>(N=12) | <b>OAG-2w</b><br>(N=12)         | <b>OAG-16w</b><br><i>OAG-0w v</i><br><i>OAG-16w;</i><br><i>OAG-16w v</i><br><i>YA-0w</i><br>(N=11) | <b>OAP-0w</b><br><i>YA-0w v</i><br><i>OAP-0w;</i><br><i>OAP-0w v</i><br><i>OAG-0w</i><br>(N=12) | <b>OAP-2w</b><br>(N=12)         | <b>OAP-16w</b><br><i>OAP-0w v</i><br><i>OAP-16w;</i><br>(N=12) |
|-------------------------------------------------|-------------------------|-------------------------|------------------------------------------------------------|---------------------------------|----------------------------------------------------------------------------------------------------|-------------------------------------------------------------------------------------------------|---------------------------------|----------------------------------------------------------------|
| Estimated glomerular filtration rate (eGFR)     | 95.0 ± 14.3             | 101.5 ± 19.1            | 77.2 ± 15.8<br><i>P=0.030</i>                              | 75.0 ± 17.7<br><i>P&gt;0.99</i> | 76.3 ± 16.0<br><i>P&gt;0.99</i><br><i>P=0.026</i>                                                  | 77.2 ± 11.3<br><i>P=0.030</i><br><i>P&gt;0.99</i>                                               | 76.3 ± 10.0<br><i>P&gt;0.99</i> | 80.4 ± 11.1<br><i>P&gt;0.99</i>                                |
| Plasma total cholesterol (LDLc) (mg/dL)         | 175.4 ± 26.6            | 168.3 ± 24.3            | 194.9 ± 34.6<br><i>P=0.73</i>                              | 195.7 ± 66.2                    | 196.2 ± 45.2<br><i>P&gt;0.99</i><br><i>P=0.67</i>                                                  | 201.0 ± 26.3<br><i>P=0.36</i><br><i>P&gt;0.99</i>                                               | 195.5 ± 26.3                    | 196.2 ± 29.8<br><i>P&gt;0.99</i><br><i>P=0.73</i>              |
| Plasma triglycerides (mg/dL)                    | 77.3 ± 28.7             | 75.0 ± 25.3             | 169.0 ± 92.5<br><i>P=0.012</i>                             | 150.7 ± 65.5                    | 141.7 ± 74.4<br><i>P=0.089</i><br><i>P=0.103</i>                                                   | 120.3 ± 48.1<br><i>P=0.45</i><br><i>P=0.34</i>                                                  | 135.3 ± 63.4                    | 115.8 ± 29.4<br><i>P=0.70</i><br><i>P=0.45</i>                 |
| Plasma HDL-cholesterol (HDLc) (mg/dL)           | 56.9 ± 17.0             | 54.9 ± 17.1             | 50.3 ± 23.4<br><i>P&gt;0.99</i>                            | 40.5 ± 10.6                     | 51.7 ± 26.2<br><i>P&gt;0.99</i><br><i>P&gt;0.99</i>                                                | 57.6 ± 17.4<br><i>P&gt;0.99</i><br><i>P&gt;0.99</i>                                             | 53.7 ± 15.6                     | 56.9 ± 16.5<br><i>P&gt;0.99</i><br><i>P&gt;0.99</i>            |
| Plasma LDL-cholesterol (mg/dL)                  | 103.0 ± 24.9            | 98.3 ± 23.3             | 116.8 ± 31.9<br><i>P&gt;0.99</i>                           | 108.4 ± 33.3                    | 116.2 ± 30.6<br><i>P&gt;0.99</i><br><i>P&gt;0.99</i>                                               | 119.4 ± 23.7<br><i>P&gt;0.99</i><br><i>P&gt;0.99</i>                                            | 110.4 ± 20.0                    | 113.8 ± 29.0<br><i>P&gt;0.99</i><br><i>P&gt;0.99</i>           |
| Plasma non-HDL-cholesterol (mg/dL)              | 118.5 ± 25.7            | 113.4 ± 25.7            | 144.7 ± 32.8<br><i>P=0.28</i>                              | 155.2 ± 65.2                    | 144.5 ± 37.0<br><i>P&gt;0.99</i><br><i>P=0.27</i>                                                  | 143.4 ± 28.7<br><i>P=0.30</i><br><i>P&gt;0.99</i>                                               | 141.8 ± 32.7                    | 139.3 ± 32.4<br><i>P&gt;0.99</i><br><i>P=0.63</i>              |
| LDLc/HDLc ratio                                 | 2.0 ± 0.8               | 2.0 ± 0.8               | 2.5 ± 0.9<br><i>P&gt;0.99</i>                              | 2.7 ± 0.7                       | 2.4 ± 1.0<br><i>P&gt;0.99</i><br><i>P&gt;0.99</i>                                                  | 2.3 ± 1.0<br><i>P&gt;0.99</i><br><i>P&gt;0.99</i>                                               | 2.3 ± 0.9                       | 2.3 ± 1.1<br><i>P&gt;0.99</i><br><i>P&gt;0.99</i>              |
| Plasma thyroid stimulating hormone (TSH, mIU/L) | 2.3 ± 1.3               | 1.8 ± 0.7               | 2.7 ± 1.6<br><i>P&gt;0.99</i>                              | 2.4 ± 1.4<br><i>P&gt;0.99</i>   | 2.3 ± 1.3<br><i>P&gt;0.99</i><br><i>P&gt;0.99</i>                                                  | 2.7 ± 1.4<br><i>P&gt;0.99</i><br><i>P&gt;0.99</i>                                               | 2.6 ± 1.3                       | 2.6 ± 1.0<br><i>P&gt;0.99</i>                                  |

| <b>Outcome measure</b>             | <b>YAG-0w</b><br>(N=11) | <b>YAG-2w</b><br>(N=11) | <b>OAG-0w</b><br><i>YA-0w v</i><br><i>OAG-0w</i><br>(N=12) | <b>OAG-2w</b><br>(N=12)       | <b>OAG-16w</b><br><i>OAG-0w v</i><br><i>OAG-16w;</i><br><i>OAG-16w v</i><br><i>YA-0w</i><br>(N=11) | <b>OAP-0w</b><br><i>YA-0w v</i><br><i>OAP-0w;</i><br><i>OAP-0w v</i><br><i>OAG-0w</i><br>(N=12) | <b>OAP-2w</b><br>(N=12)       | <b>OAP-16w</b><br><i>OAP-0w v</i><br><i>OAP-16w;</i><br>(N=12) |
|------------------------------------|-------------------------|-------------------------|------------------------------------------------------------|-------------------------------|----------------------------------------------------------------------------------------------------|-------------------------------------------------------------------------------------------------|-------------------------------|----------------------------------------------------------------|
| Plasma free thyroxine (FT4, ng/L)  | 1.2 ± 0.2               | 1.2 ± 0.2               | 1.0 ± 0.2<br><i>P=0.13</i>                                 | 1.1 ± 0.1<br><i>P&gt;0.99</i> | 1.1 ± 0.2<br><i>P&gt;0.99</i><br><i>P=0.48</i>                                                     | 1.0 ± 0.1<br><i>P=0.089</i><br><i>P&gt;0.99</i>                                                 | 1.1 ± 0.2<br><i>P&gt;0.99</i> | 1.1 ± 0.1<br><i>P&gt;0.99</i>                                  |
| Glycosylated hemoglobin (HbA1c, %) | 5.3 ± 0.2               | -                       | 5.8 ± 0.2<br><i>P&lt;0.001</i>                             | -                             | -                                                                                                  | 5.6 ± 0.3<br><i>P=0.03</i>                                                                      | -                             |                                                                |

**Supplemental Table S2: Monitored blood labs.** Data are summarized by means with standard deviations. P-values compare means estimated by the general linear mixed regression model. 2w, 4w, 8w, 12w, 16w refer to weeks after receiving supplements. P = compared to 0w.

|                                                        | <b>0w</b>  | <b>2w</b>                       | <b>4w</b>                       | <b>8w</b>                       | <b>12w</b>                      | <b>16w</b>                      |
|--------------------------------------------------------|------------|---------------------------------|---------------------------------|---------------------------------|---------------------------------|---------------------------------|
| <b>Alanine transaminase (ALT; U/L)</b>                 |            |                                 |                                 |                                 |                                 |                                 |
| YAG<br>(N=11)                                          | 17.1 ± 5.8 | 16.5 ± 5.9<br><i>P&gt;0.99</i>  | -                               | -                               | -                               | -                               |
| OAG (N=12 for 0w,<br>2w; N=11 for 4w,<br>8w, 12w, 16w) | 24.6 ± 9.6 | 25.1 ± 10.2<br><i>P&gt;0.99</i> | 25.5 ± 11.4<br><i>P&gt;0.99</i> | 23.2 ± 13.8<br><i>P&gt;0.99</i> | 24.9 ± 18.6<br><i>P&gt;0.99</i> | 25.2 ± 19.3<br><i>P&gt;0.99</i> |
| OAP (N=12)                                             | 23.0 ± 9.0 | 23.8 ± 10.1<br><i>P&gt;0.99</i> | 22.1 ± 7.5<br><i>P&gt;0.99</i>  | 23.1 ± 7.6<br><i>P&gt;0.99</i>  | 20.8 ± 4.2<br><i>P&gt;0.99</i>  | 24.9 ± 8.3<br><i>P&gt;0.99</i>  |
| <b>Aspartate transaminase (AST; U/L)</b>               |            |                                 |                                 |                                 |                                 |                                 |
| YAG<br>(N=11)                                          | 18.3 ± 8.2 | 20.1 ± 10.2<br><i>P&gt;0.99</i> | -                               | -                               | -                               | -                               |
| OAG (N=12 for 0w,<br>2w; N=11 for 4w,<br>8w, 12w, 16w) | 21.9 ± 3.8 | 23.9 ± 7.4<br><i>P&gt;0.99</i>  | 21.3 ± 7.1<br><i>P&gt;0.99</i>  | 20.5 ± 6.6<br><i>P&gt;0.99</i>  | 22.6 ± 8.9<br><i>P&gt;0.99</i>  | 25.2 ± 9.6<br><i>P&gt;0.99</i>  |
| OAP (N=12)                                             | 24.2 ± 6.3 | 23.9 ± 8.2<br><i>P&gt;0.99</i>  | 19.9 ± 8.2<br><i>P=0.27</i>     | 20.0 ± 6.2<br><i>P=0.38</i>     | 20.1 ± 6.8<br><i>P&gt;0.99</i>  | 23.4 ± 9.5<br><i>P&gt;0.99</i>  |
| <b>Creatinine (mg/dl)</b>                              |            |                                 |                                 |                                 |                                 |                                 |
| YAG<br>(N=11)                                          | 0.9 ± 0.2  | 0.8 ± 0.2<br><i>P=0.44</i>      | -                               | -                               | -                               | -                               |
| OAG (N=12 for 0w,<br>2w; N=11 for 4w,<br>8w, 12w, 16w) | 0.9 ± 0.2  | 0.9 ± 0.2<br><i>P&gt;0.99</i>   | 0.9 ± 0.2<br><i>P&gt;0.99</i>   | 1.0 ± 0.3<br><i>P&gt;0.99</i>   | 1.0 ± 0.3<br><i>P&gt;0.99</i>   | 0.9 ± 0.2<br><i>P&gt;0.99</i>   |
| OAP (N=12)                                             | 0.8 ± 0.2  | 0.9 ± 0.2<br><i>P&gt;0.99</i>   | 0.9 ± 0.2<br><i>P=0.10</i>      | 0.9 ± 0.2<br><i>P&gt;0.99</i>   | 0.8 ± 0.1<br><i>P&gt;0.99</i>   | 0.8 ± 0.1<br><i>P&gt;0.99</i>   |

Supplemental Figure S1: Effect of GlyNAC supplementation of age-associated defects

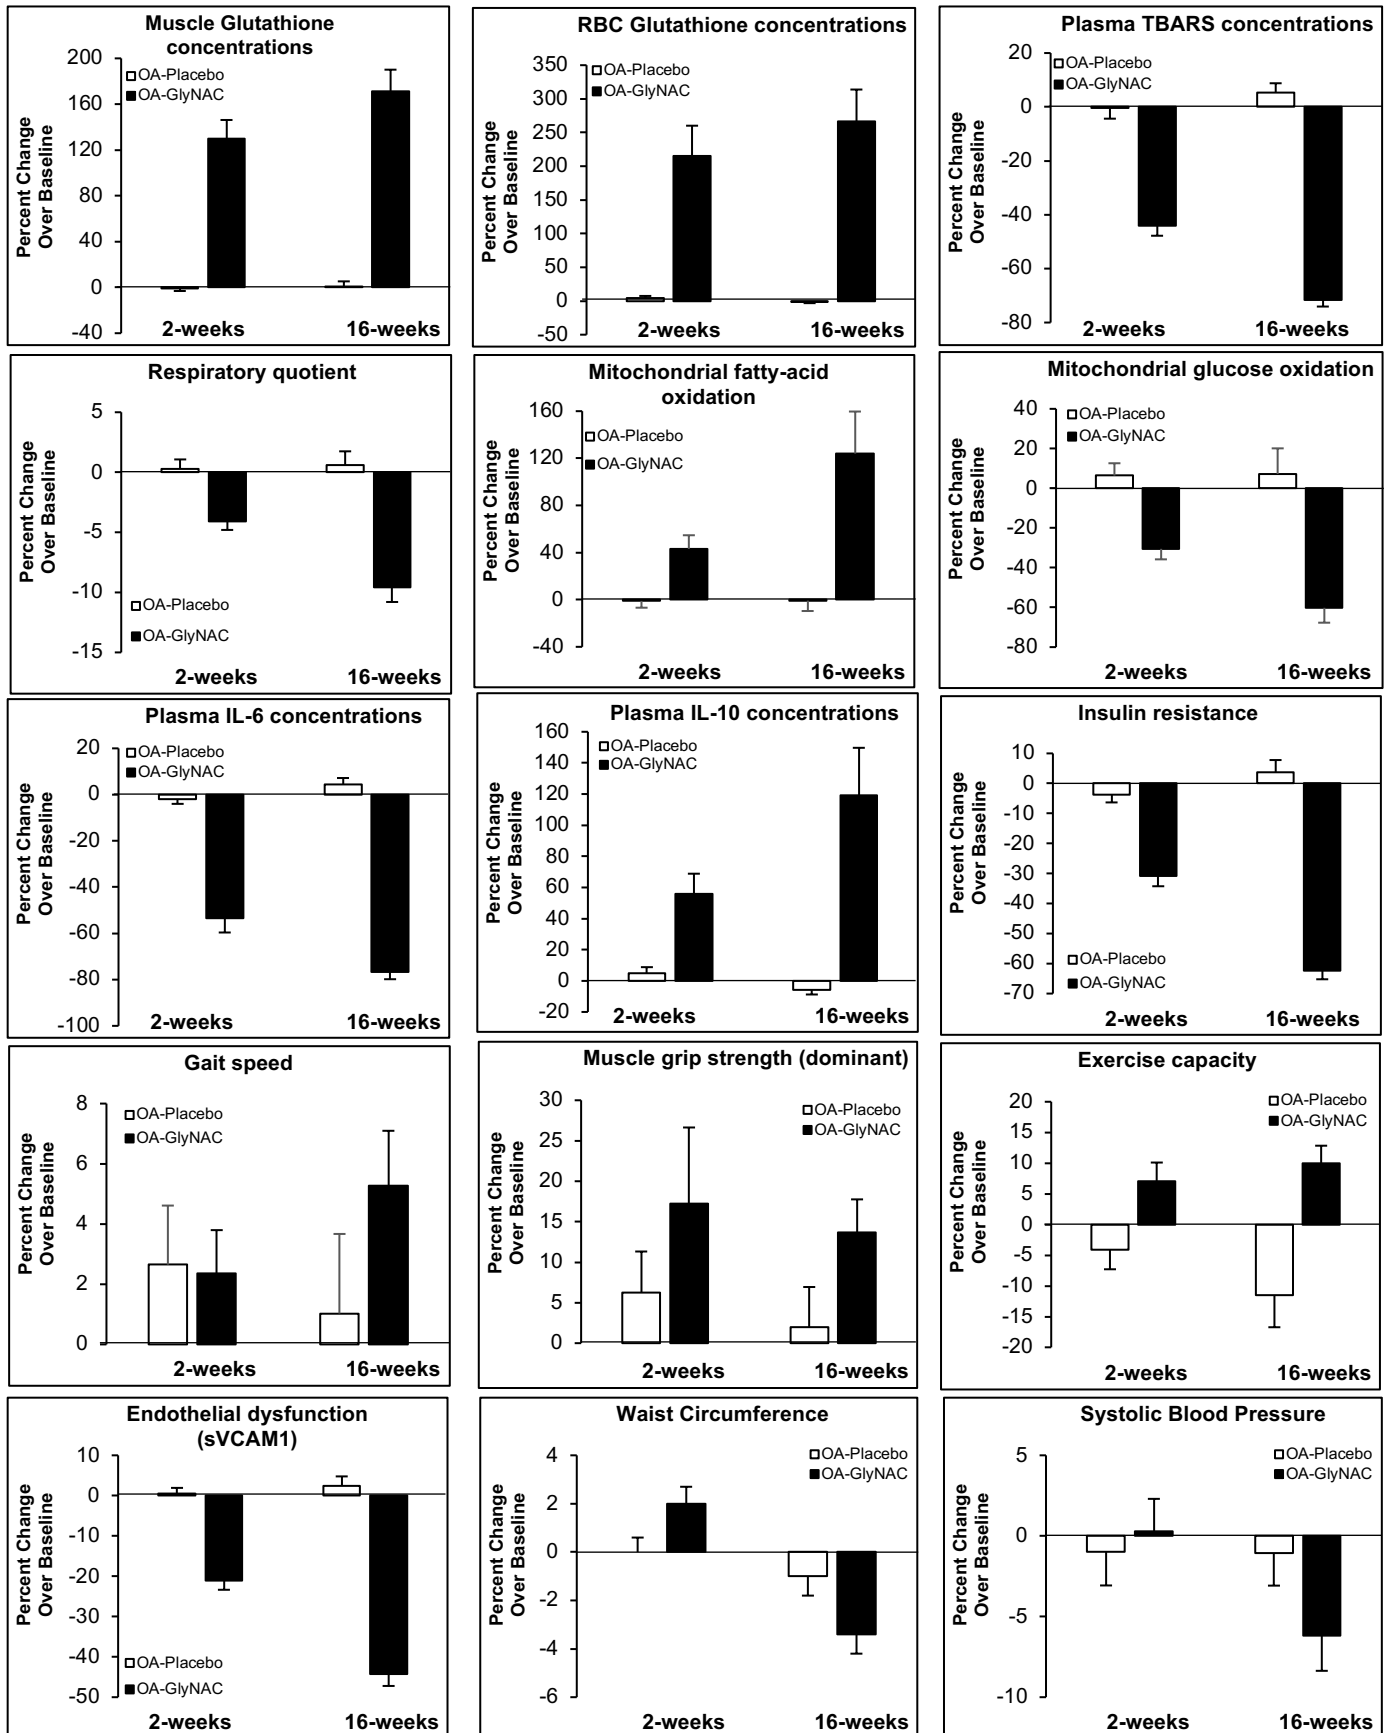

**Supplemental Figure S2: Response of aging hallmarks in older adults to supplementation with GlyNAC**

| <b>Aging hallmarks</b>              | <b>Effect of GlyNAC</b> |
|-------------------------------------|-------------------------|
| Mitochondrial impairment            | Improves                |
| Dysregulated nutrient sensing       | Improves                |
| Altered intercellular communication | Improves                |
| Genomic instability                 | Improves                |
| Loss of proteostasis                | Improves                |
| Cellular senescence                 | Improves                |
| Stem cell exhaustion                | Improves                |
| Telomere shortening                 | Not tested              |
| Epigenetic alterations              | Not tested              |
